# Supplementary material for: Open-source sea ice drift algorithm for Sentinel-1 SAR imagery using a combination of feature tracking and pattern matching
Source: Copernicus journal article supplement (doi:10.5194/tc-11-1835-2017), 2017-08-07
Supplement: Supplementary file 1 [file tc-11-1835-2017-supplement.zip]

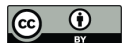

## *Supplement of*

# **Open-source sea ice drift algorithm for Sentinel-1 SAR imagery using a combination of feature tracking and pattern matching**

**Stefan Muckenhuber and Stein Sandven**

*Correspondence to:* Stefan Muckenhuber ([stefan.muckenhuber@gmail.com](mailto:stefan.muckenhuber@gmail.com))

- [tc-11-1835-2017-supplement-title-page.pdf](#)
- [ft\\_mcc\\_example.py](#)
- [ft\\_mcc\\_functions.py](#)

The copyright of individual parts of the supplement might differ from the CC BY 3.0 License.
